# Supplementary material for: Seroprevalence of antibodies to enterovirus 71 and coxsackievirus A16 among people of various age groups in a northeast province of Thailand
Source: PubMed Central journal article supplement (PMC6192276; doi:10.1186/s12985-018-1074-8), 2018-10-16
Supplement: 12985_2018_1074_MOESM5_ESM.pdf [file 12985_2018_1074_MOESM5_ESM.pdf]

```

      ↗ VP4 (1 - 69)
      10      20      30      40      50      60
SiICRC06/TH/2011 (CA16-B1a) ** MGSQVSTQRS GSHENSNSAS EGSTINYTTI NYYKDAYAAS AGRQDMSQDP KKFTDPVMDV
TH/MUMT-1/2015 (CA16-B1a) .....
SiICRC01/TH/2012 (CA16-B1b) ** .....
TH/MUMT-2/2015 (CA16-B1b) .....

      ↗ VP2 (70 - 323)
      70      80      90      100     110     120
SiICRC06/TH/2011 (CA16-B1a) ** IHEMAPPLKS PSAEACGYSD RVAQLTIGNS TITTQEAAANI VIAYGEWPEY CPDTPDATAVD
TH/MUMT-1/2015 (CA16-B1a) .....
SiICRC01/TH/2012 (CA16-B1b) ** .....
TH/MUMT-2/2015 (CA16-B1b) .....

      130     140     150     160     170     180
SiICRC06/TH/2011 (CA16-B1a) ** KPTRPDVSVN RFFTLDTKSW ARDSKGWYWK FPDVLTVEGV FGQNAQFHYL YRSGFCVHVQ
TH/MUMT-1/2015 (CA16-B1a) .....
SiICRC01/TH/2012 (CA16-B1b) ** .....
TH/MUMT-2/2015 (CA16-B1b) .....

      190     200     210     220     230     240
SiICRC06/TH/2011 (CA16-B1a) ** CNASKFHQGA LLVAVLPEYV LGTIAGGTGN ENSHPPYATT QPGQVGAVLT HPYVLDAGIP
TH/MUMT-1/2015 (CA16-B1a) .....
SiICRC01/TH/2012 (CA16-B1b) ** .....
TH/MUMT-2/2015 (CA16-B1b) .....

      250     260     270     280     290     300
SiICRC06/TH/2011 (CA16-B1a) ** LSQLTVCPhQ WINLRTNCA TIIVPYMNTV PFDSALNHCN FGLLVIPVVP LDFNTGATSE
TH/MUMT-1/2015 (CA16-B1a) .....
SiICRC01/TH/2012 (CA16-B1b) ** .....
TH/MUMT-2/2015 (CA16-B1b) .....

      ↗ VP3 (324 - 565)
      310     320     330     340     350     360
SiICRC06/TH/2011 (CA16-B1a) ** IPITVTIAPM CAEFAGLRQA VKQGIPTLTK PGTNQLFTTD DGVSAPILPG FHPTPIHIP
TH/MUMT-1/2015 (CA16-B1a) .....
SiICRC01/TH/2012 (CA16-B1b) ** .....
TH/MUMT-2/2015 (CA16-B1b) .....

      370     380     390     400     410     420
SiICRC06/TH/2011 (CA16-B1a) ** GEVHNLEIC RVETILEVNN LKTNETTPMQ RLCFPVSVQS KTGELCAAFR ADPGRDGPWQ
TH/MUMT-1/2015 (CA16-B1a) .....
SiICRC01/TH/2012 (CA16-B1b) ** .....
TH/MUMT-2/2015 (CA16-B1b) .....

      430     440     450     460     470     480
SiICRC06/TH/2011 (CA16-B1a) ** STILGQLCRY YTQWSGSLEV TFMFAGSFMA TGKMLIAYTP PGGNVPADRI TAMLGTHVIW
TH/MUMT-1/2015 (CA16-B1a) .....
SiICRC01/TH/2012 (CA16-B1b) ** .....
TH/MUMT-2/2015 (CA16-B1b) .....

      490     500     510     520     530     540
SiICRC06/TH/2011 (CA16-B1a) ** DFGLQSSVTL VVPWISNTHY RAHARAGYFD YTTGIIITIW YQTNVYVPIG APTTAYIVAL
TH/MUMT-1/2015 (CA16-B1a) .....
SiICRC01/TH/2012 (CA16-B1b) ** .....
TH/MUMT-2/2015 (CA16-B1b) .....

```

**Figure S4** VP1-VP4 amino acid alignment of CA16. GenBank accession numbers: KX372335 for SiICRC06/TH/2011(CA16-B1a), MH879030 for TH/MUMT-1/2015(CA16-B1a), KX372336 for SiICRC01/TH/2012(CA16-B1b), and MH879031 for TH/MUMT-2/2015(CA16-B1b). \*\* Test viruses for MN assay in this study

 VP1 (566 - 862)

```

      550      560      570      580      590      600
      |...|...|...|...|...|...|...|...|...|...|...|...|
SiICRC06/TH/2011 (CA16-B1a) ** AAAQDNFTMK LCKDTEIEQ TANIQGDPIA DMIDQTVNNQ VNRSALTALQV LPTAANTEAS
TH/MUMT-1/2015 (CA16-B1a) .....
SiICRC01/TH/2012 (CA16-B1b) ** .....
TH/MUMT-2/2015 (CA16-B1b) .....

      610      620      630      640      650      660
      |...|...|...|...|...|...|...|...|...|...|...|...|
SiICRC06/TH/2011 (CA16-B1a) ** SHRLGTGVVP ALQAAETGAS SNASDKNLIE TRCVLNHHST QETAIGNFFS RAGLVSIIITM
TH/MUMT-1/2015 (CA16-B1a) .....
SiICRC01/TH/2012 (CA16-B1b) ** .....
TH/MUMT-2/2015 (CA16-B1b) .....

      670      680      690      700      710      720
      |...|...|...|...|...|...|...|...|...|...|...|...|
SiICRC06/TH/2011 (CA16-B1a) ** PTTGTQNTDG YVNWIDIDLMG YAQLRRKCEL FTYMRFDAEF TFVVKPNGE LVPQLLQYMY
TH/MUMT-1/2015 (CA16-B1a) .....
SiICRC01/TH/2012 (CA16-B1b) ** .....
TH/MUMT-2/2015 (CA16-B1b) .....

      730      740      750      760      770      780
      |...|...|...|...|...|...|...|...|...|...|...|...|
SiICRC06/TH/2011 (CA16-B1a) ** VPPGAPKETS RDSFAWQTAT NPSVFKMTD PPAQVSVPFM SPASAYQWFY DGYPTFGEHL
TH/MUMT-1/2015 (CA16-B1a) .....
SiICRC01/TH/2012 (CA16-B1b) ** .....
TH/MUMT-2/2015 (CA16-B1b) .....

      790      800      810      820      830      840
      |...|...|...|...|...|...|...|...|...|...|...|...|
SiICRC06/TH/2011 (CA16-B1a) ** QANDLDYGQC PNNMMGTFSI RTVGTEKSPH SITLRFVYMRI KHVRAWIPRP LRNPYPYLFKT
TH/MUMT-1/2015 (CA16-B1a) .....
SiICRC01/TH/2012 (CA16-B1b) ** .....
TH/MUMT-2/2015 (CA16-B1b) .....

      850      860
      |...|...|...|...|...|...|...|...|...|...|...|...|
SiICRC06/TH/2011 (CA16-B1a) ** NPNYKGNDIK CTSTSRDKIT TL
TH/MUMT-1/2015 (CA16-B1a) .....
SiICRC01/TH/2012 (CA16-B1b) ** .....
TH/MUMT-2/2015 (CA16-B1b) .....
  
```

**Figure S4** (Continued). \*\* Test viruses for MN assay in this study
