# Supplementary material for: Seroprevalence of antibodies to enterovirus 71 and coxsackievirus A16 among people of various age groups in a northeast province of Thailand
Source: Springer Nature journal article supplement (doi:10.1186/s12985-018-1074-8), 2018-10-16
Supplement: MOESM1 [file 16204092]

**Table S1** The primer sets for amplification and nucleotide sequencing VP1-VP4 of EV71 and CA16

| Fragment                   | Primers   | Position   | Product size (bp) | Sequences (5'---3')    |
|----------------------------|-----------|------------|-------------------|------------------------|
| <b>Primer sets of EV71</b> |           |            |                   |                        |
| 1                          | FL-F-1-C  | 1 - 21     | ~1,075            | TTAAAACAGCCTGTGGGTTG   |
|                            | 1075R     | 1061-1080  |                   | CAGTAMGAYGGCCARTCKCC   |
|                            | 636R*     | 619-639    |                   | CCAATCCAATAGCTATATGGC  |
| 2                          | 447F      | 447 - 467  | ~920              | TAGTCCTCCGGCCCCTGAAT   |
|                            | 1366R     | 1349-1367  |                   | CGCCTGCCACTGTCCCWAT    |
| 3                          | 1178F     | 1181- 1198 | ~1,200            | TCCAAGGGRTGGTAYTGG     |
|                            | 2376R     | 2357- 2376 |                   | GCYGCCGCYAGTGCTATTAT   |
| 4                          | 2191F     | 2192- 2210 | ~1,255            | TTTGGGCTRCAATCRTCTG    |
|                            | 3446R     | 3428-3446  |                   | GRGAGCTGTCTTCCCAAAC    |
| <b>Primer sets of CA16</b> |           |            |                   |                        |
| 1                          | CA16_A    | 1- 20      | ~1,075            | TTAAAACAGCCTGTGGGTTG   |
|                            | CA16_A2R  | 1057-1074  |                   | CCAYTCCCCATAKGCTAT     |
|                            | CA16_A1R* | 592 - 611  |                   | CAATTGTCACCATAAGCAGC   |
| 2                          | CA16_B1F  | 543-560    | ~1,140            | GCGGAACCGACTACTTTG     |
|                            | CA16_B1R  | 1666-1683  |                   | RCACATGGGAGCTATGGT     |
| 3                          | CA16_B2F  | 1423-1440  | ~1,014            | CAGGTTGGTGCAGTHCT      |
|                            | CA16_B2R  | 2417-2435  |                   | GTTTGCTCAATRTCCTCHG    |
| 4                          | CA16_B3F  | 2182-2220  | ~1,006            | CATGTGATCTGGGACTTY     |
|                            | CA16_B3R  | 3169-3188  |                   | ATGGAGTGTGGTGACTIONCTC |

VP1-VP4 regions of EV71 and CA16 were amplified into 4 fragments of DNA products by using 4 pairs of primer sets; all these primers were also used as sequencing primers.

\*Primers 636R and CA16\_A1R were only used as sequencing primers for fragment 1 of EV71 and CA16, respectively.
