# Supplementary material for: Seroprevalence of antibodies to enterovirus 71 and coxsackievirus A16 among people of various age groups in a northeast province of Thailand
Source: Springer Nature journal article supplement (doi:10.1186/s12985-018-1074-8), 2018-10-16
Supplement: MOESM3 [file 16204092]

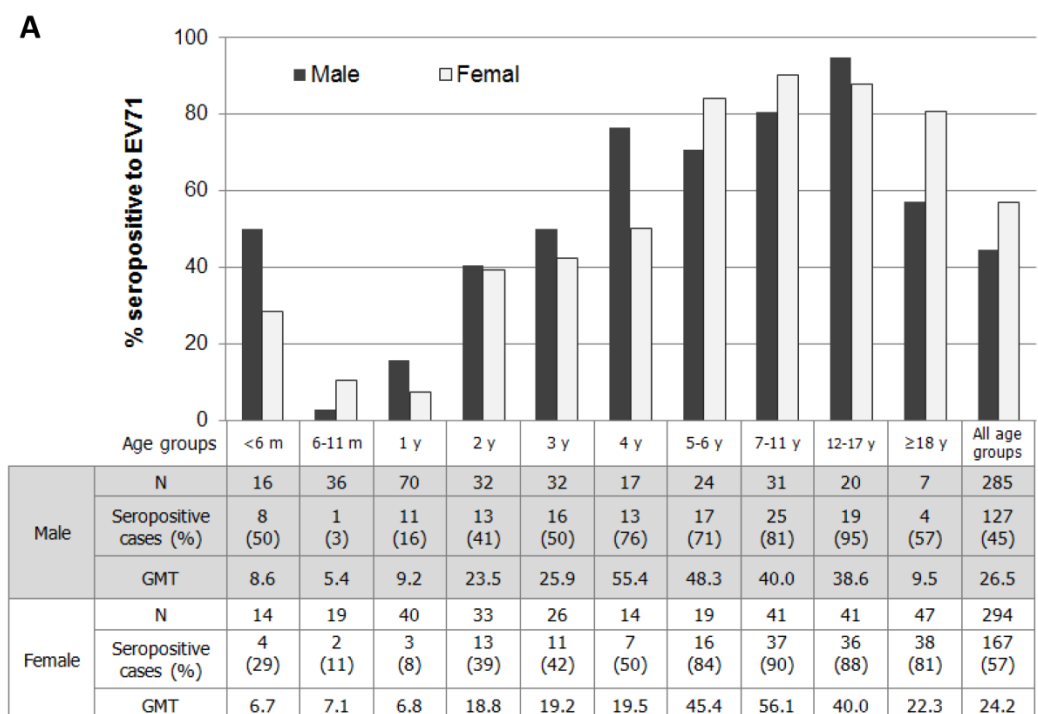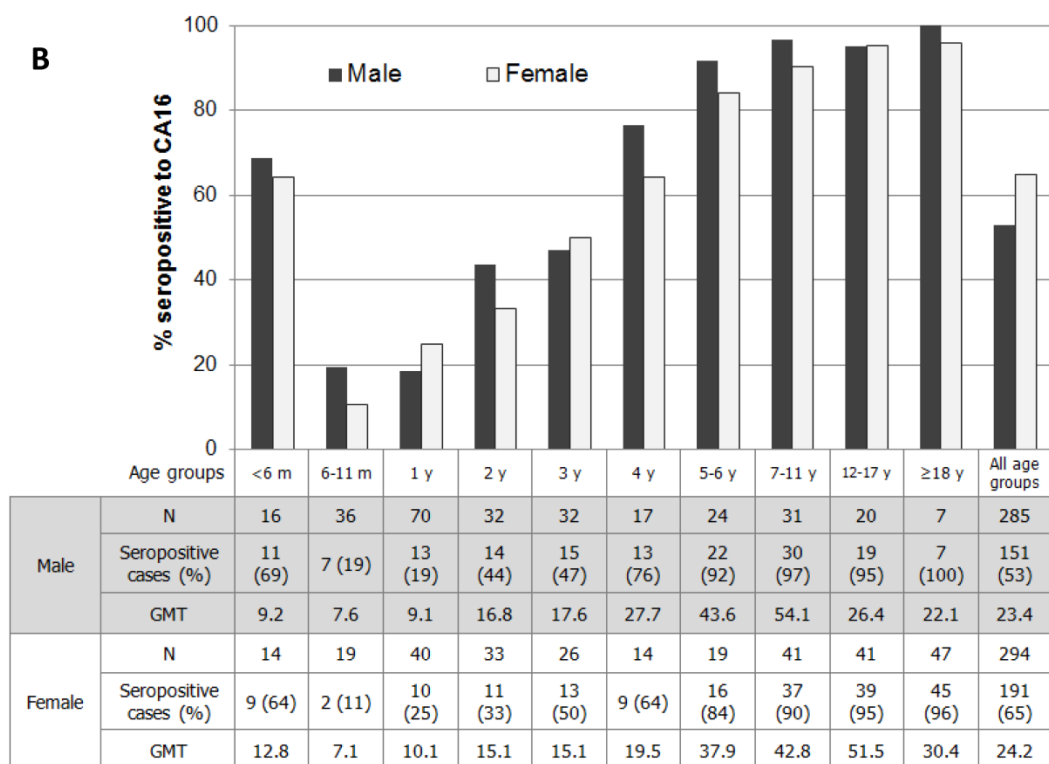

**Figure S2** Seropositivity of NT antibodies against EV71 (A) and CA16 (B) by gender.
