# Supplementary material for: Seroprevalence of antibodies to enterovirus 71 and coxsackievirus A16 among people of various age groups in a northeast province of Thailand
Source: Springer Nature journal article supplement (doi:10.1186/s12985-018-1074-8), 2018-10-16
Supplement: MOESM4 [file 16204092]

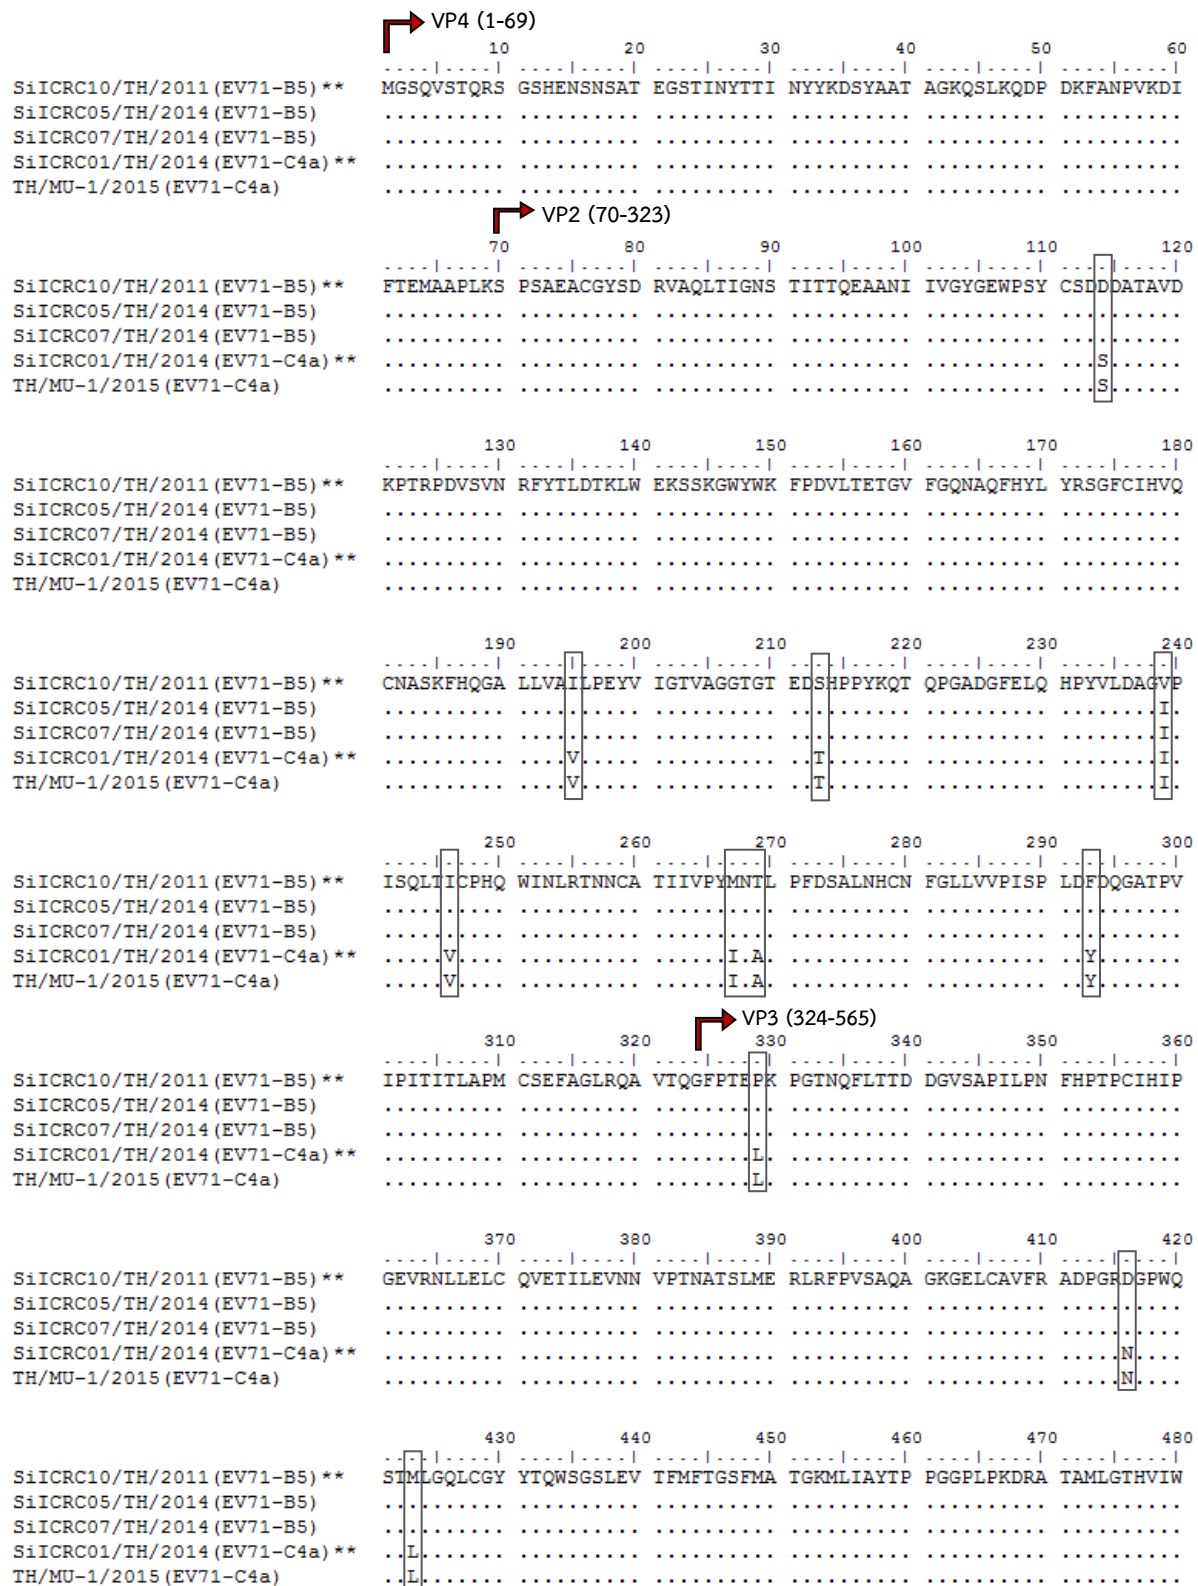

**Figure S3** VP1-VP4 amino acid alignment of EV71. GenBank accession numbers: KX372311 for SiICRC10/TH/2011(EV71-B5), KX372329 for SiICRC05/TH/2014(EV71-B5), KX372331 for SiICRC07/TH/2014(EV71-B5), KX372328 for SiICRC01/TH/2014(EV71-C4a), and MH879029 for TH/MU-1/2015(EV71-C4a). \*\* Test viruses for MN assay in this study

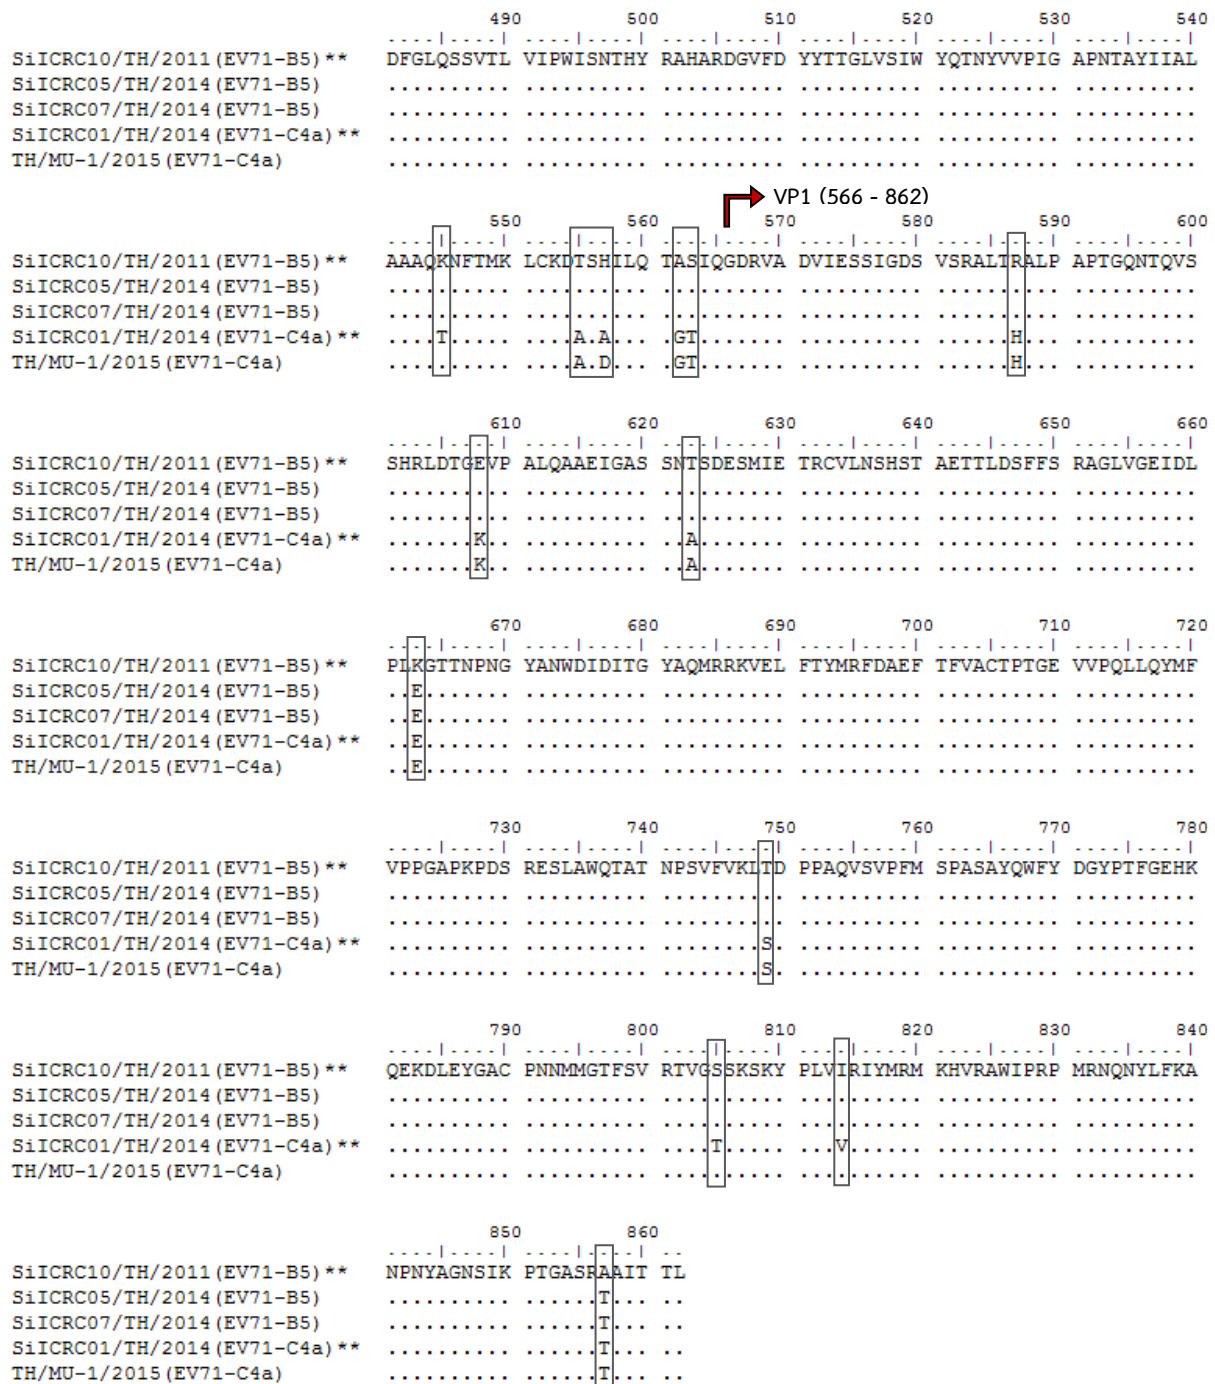

**Figure S3 (Continued).** \*\* Test viruses for MN assay in this study
